# Supplementary material for: Depression and Anxiety in Association with Polypharmacy in Patients with Multiple Sclerosis
Source: MDPI journal article supplement (doi:10.3390/jcm12165379), 2023-08-18
Supplement: s1 [file s1]

**Supplementary Table S1: Frequency of use of drug classes according to ATC classification system in relation to anxiety (*n* (%))**

|                                                                         | HADS-A<br>0-7 | HADS-A<br>8-10 | HADS-A<br>11-21 | Total<br>sample | <i>p</i>      |
|-------------------------------------------------------------------------|---------------|----------------|-----------------|-----------------|---------------|
| A02 - Drugs for acid related disorders                                  | 49 (23.7)     | 25 (24.3)      | 15 (23.4)       | 89 (23.8)       | 0.990         |
| A03 - Drugs for functional gastrointestinal disorders                   | 0 (0.0)       | 1 (1.0)        | 1 (1.6)         | 2 (0.5)         | 0.253         |
| A04 - Antiemetics and antinauseants                                     | 0 (0.0)       | 1 (1.0)        | 0 (0.0)         | 1 (0.3)         | 0.267         |
| A06 - Drugs for constipation                                            | 5 (2.4)       | 3 (2.9)        | 0 (0.0)         | 8 (2.1)         | 0.413         |
| A07- Antidiarrheals, intestinal anti-inflammatory/anti-infective agents | 2 (1.0)       | 3 (2.9)        | 0 (0.0)         | 5 (1.3)         | 0.221         |
| A10 - Drugs used in diabetes                                            | 7 (3.4)       | 3 (2.9)        | 4 (6.3)         | 14 (3.7)        | 0.499         |
| A11 – Vitamins                                                          | 100 (48.3)    | 52 (50.5)      | 35 (54.7)       | 187 (50.0)      | 0.667         |
| A12 - Mineral supplements                                               | 23 (11.1)     | 18 (17.5)      | 9 (14.1)        | 50 (13.4)       | 0.296         |
| A16 - Other alimentary tract and metabolism products                    | 0 (0.0)       | 1 (1.0)        | 0 (0.0)         | 1 (0.3)         | 0.267         |
| B01 - Antithrombotic agents                                             | 33 (15.9)     | 15 (14.6)      | 5 (7.8)         | 53 (14.2)       | 0.263         |
| C01- Cardiac therapy                                                    | 3 (1.4)       | 2 (1.9)        | 1 (1.6)         | 6 (1.6)         | 0.948         |
| C02 - Antihypertensive drugs                                            | 1 (0.5)       | 2 (1.9)        | 0 (0.0)         | 3 (0.8)         | 0.292         |
| C03 - Diuretic drugs                                                    | 10 (4.8)      | 4 (3.9)        | 3 (4.7)         | 17 (4.5)        | 0.930         |
| C07 - Beta blocking agents                                              | 23 (11.1)     | 14 (13.6)      | 11 (17.2)       | 48 (12.8)       | 0.430         |
| C08 - Calcium channel blockers                                          | 10 (4.8)      | 4 (3.9)        | 2 (3.1)         | 16 (4.3)        | 0.818         |
| C09 - Agents acting on the renin-angiotensin system                     | 43 (20.8)     | 15 (14.6)      | 8 (12.5)        | 66 (17.6)       | 0.199         |
| C10 - Lipid modifying agents                                            | 22 (10.6)     | 12 (11.7)      | 5 (7.8)         | 39 (10.4)       | 0.725         |
| G04 - Urological drugs                                                  | 40 (19.3)     | 13 (12.6)      | 7 (10.9)        | 60 (16.0)       | 0.150         |
| H02 - Corticosteroids systemic                                          | 43 (20.8)     | 19 (18.4)      | 9 (14.1)        | 71 (19.0)       | 0.482         |
| H03 - Thyroid therapy                                                   | 30 (14.5)     | 18 (17.5)      | 5 (7.8)         | 53 (14.2)       | 0.215         |
| L02 - Endocrine therapy                                                 | 1 (0.5)       | 0 (0.0)        | 2 (3.1)         | 3 (0.8)         | 0.066         |
| L03 - Immunostimulants drugs                                            | 47 (22.7)     | 28 (27.2)      | 12 (18.8)       | 87 (23.3)       | 0.437         |
| L04 - Immunosuppressants drugs                                          | 76 (36.7)     | 38 (36.9)      | 26 (40.6)       | 140 (37.4)      | 0.845         |
| M01 - Anti-inflammatory and antirheumatic drugs                         | 35 (16.9)     | 21 (20.4)      | 11 (17.2)       | 67 (17.9)       | 0.743         |
| M02 - Topical products for joint and muscular pain                      | 0 (0.0)       | 1 (1.0)        | 0 (0.0)         | 1 (0.3)         | 0.267         |
| M04 - Antigout preparations                                             | 1 (0.5)       | 1 (1.0)        | 1 (1.6)         | 3 (0.8)         | 0.682         |
| M05 - Drugs effecting bone structure and mineralization                 | 5 (2.4)       | 2 (1.9)        | 0 (0.0)         | 7 (1.9)         | 0.459         |
| M09 - Other drugs for disorders of the musculo-skeletal system          | 2 (1.0)       | 0 (0.0)        | 0 (0.0)         | 2 (0.5)         | 0.444         |
| N02 - Analgesic drugs                                                   | 52 (25.1)     | 27 (26.2)      | 23 (35.9)       | 102 (27.3)      | 0.227         |
| N03 - Antiepileptic drugs                                               | 28 (13.5)     | 14 (13.6)      | 8 (12.5)        | 50 (13.4)       | 0.975         |
| N04 - Antiparkinson drugs                                               | 2 (1.0)       | 4 (3.9)        | 5 (7.8)         | 11 (2.9)        | <b>0.014</b>  |
| N05 - Psycholeptic drugs                                                | 3 (1.4)       | 3 (2.9)        | 7 (10.9)        | 13 (3.5)        | <b>0.001*</b> |
| N06 – Psychoanaleptics                                                  | 28 (13.5)     | 25 (24.3)      | 19 (29.7)       | 72 (19.3)       | <b>0.005</b>  |
| N07 - Other nervous system drugs                                        | 20 (9.7)      | 9 (8.7)        | 3 (4.7)         | 32 (8.6)        | 0.460         |
| R03 - Drugs for obstructive airway diseases                             | 6 (2.9)       | 6 (5.8)        | 2 (3.1)         | 14 (3.7)        | 0.424         |
| R05 - Cough and cold drugs                                              | 1 (0.5)       | 0 (0.0)        | 0 (0.0)         | 1 (0.3)         | 0.667         |
| R06 - Antihistamines for systemic use                                   | 15 (7.2)      | 7 (6.8)        | 6 (9.4)         | 28 (7.5)        | 0.812         |
| V03 - All other therapeutic products                                    | 0 (0.0)       | 0 (0.0)        | 2 (3.1)         | 2 (0.5)         | <b>0.008</b>  |
| V06 - General nutrients                                                 | 10 (4.8)      | 7 (6.8)        | 8 (12.5)        | 25 (6.7)        | 0.100         |
| V60A – Homeopathics                                                     | 3 (1.4)       | 1 (1.0)        | 3 (4.7)         | 7 (1.9)         | 0.181         |

Chi-square test was used to calculate p-values, \*– *p* after FDR correction <0.05, df – degree of freedom, FDR – False Discovery Rate, HADS-A – subscale of anxiety of the Hospital Anxiety and Depression Scale, *n* – number of patients, *p* – p-value for comparing patients with different HADS-A score
