# Supplementary material for: Depression and Anxiety in Association with Polypharmacy in Patients with Multiple Sclerosis
Source: MDPI journal article supplement (doi:10.3390/jcm12165379), 2023-08-18
Supplement: s1 [file s1]

# Supplementary Document S1: Structured interview

## Baseline questionnaire – 2019

---

### ***Sociodemographic***

**Birth date:** \_\_\_\_\_years

**Sex:**    ☐ female  
            ☐ male

**Partnership status:**    ☐ single living  
                                  ☐ partnership

**Current job situation:**

☐ in training  
☐ studies  
☐ employment: ☐ full-time                      ☐ part-time  
☐ unemployment  
☐ pension:                      ☐ due to old age                      ☐ due to disability  
☐ other

**School years (at most until A-levels):** \_\_\_\_\_years

**Educational level:**    ☐ no training  
                                  ☐ skilled worker  
                                  ☐ technical college  
                                  ☐ university

**Place of residence:**

---

☐ rural community (until 5000 inhabitants)  
☐ provincial town (>5000-20000 inhabitants)  
☐ medium-sized town (>20000-100000 inhabitants)  
☐ city (>100000 inhabitants)

**Number of children:** \_\_\_\_\_

**Number of siblings:** \_\_\_\_\_

---

**Clinical-neurological**

**Current pregnancy:**    ☐ no  
                                     ☐ yes

**Pregnancy planned in the near future:**    ☐ no  
                                                                 ☐ yes

**Number and kind of comorbidities:**

**Disease course:**    ☐ clinically isolated syndrome (CIS)  
                                 ☐ relapsing-remitting multiple sclerosis (RRMS)  
                                 ☐ secondary progressive multiple sclerosis (SPMS)  
                                 ☐ primary progressive multiple sclerosis (PPMS)  
                                 ☐ undefined

**Clinical care:**    ☐ outpatient  
                             ☐ inpatient

**Date of initial CIS/MS diagnosis (month/year):** \_\_\_\_\_

**Current Expanded Disability Status Scale (EDSS) Score:** \_\_\_\_\_

---

## Medication

### Use of disease-modifying drugs (DMD)

|                                                                              | Currently                | Previously               | Never                    | Unknown                  |
|------------------------------------------------------------------------------|--------------------------|--------------------------|--------------------------|--------------------------|
| Interferon beta (Avonex, Rebif, Plegridy, Betaferon, Extavia)                | <input type="checkbox"/> | <input type="checkbox"/> | <input type="checkbox"/> | <input type="checkbox"/> |
| Glatiramer acetate (Copaxone)                                                | <input type="checkbox"/> | <input type="checkbox"/> | <input type="checkbox"/> | <input type="checkbox"/> |
| Teriflunomide (Aubagio)                                                      | <input type="checkbox"/> | <input type="checkbox"/> | <input type="checkbox"/> | <input type="checkbox"/> |
| Fingolimod (Gilenya)                                                         | <input type="checkbox"/> | <input type="checkbox"/> | <input type="checkbox"/> | <input type="checkbox"/> |
| Dimethyl fumarate (Tecfidera)                                                | <input type="checkbox"/> | <input type="checkbox"/> | <input type="checkbox"/> | <input type="checkbox"/> |
| Mitoxantrone (Novantron, Ralenova)                                           | <input type="checkbox"/> | <input type="checkbox"/> | <input type="checkbox"/> | <input type="checkbox"/> |
| Natalizumab (Tysabri)                                                        | <input type="checkbox"/> | <input type="checkbox"/> | <input type="checkbox"/> | <input type="checkbox"/> |
| Alemtuzumab (Lemtrada)                                                       | <input type="checkbox"/> | <input type="checkbox"/> | <input type="checkbox"/> | <input type="checkbox"/> |
| Daclizumab                                                                   | <input type="checkbox"/> | <input type="checkbox"/> | <input type="checkbox"/> | <input type="checkbox"/> |
| Ocrelizumab (Ocrevus)                                                        | <input type="checkbox"/> | <input type="checkbox"/> | <input type="checkbox"/> | <input type="checkbox"/> |
| Cladribine (Mavenclad)                                                       | <input type="checkbox"/> | <input type="checkbox"/> | <input type="checkbox"/> | <input type="checkbox"/> |
| Intravenous immunoglobulin G (Octagam)                                       | <input type="checkbox"/> | <input type="checkbox"/> | <input type="checkbox"/> | <input type="checkbox"/> |
| Azathioprine (AZA-effect, Aza-Q, Azafalk, Azaimun, Azamedac, Imurek, Imurel) | <input type="checkbox"/> | <input type="checkbox"/> | <input type="checkbox"/> | <input type="checkbox"/> |
| Cyclophosphamide                                                             | <input type="checkbox"/> | <input type="checkbox"/> | <input type="checkbox"/> | <input type="checkbox"/> |
| Cyclic glucocorticosteroids (Urbason)                                        | <input type="checkbox"/> | <input type="checkbox"/> | <input type="checkbox"/> | <input type="checkbox"/> |

### Reason for DMD switch:

- ☐ Side effects
- ☐ Disease activity despite DMD treatment
- ☐ Pregnancy
- ☐ Personal
- ☐ Other

**Medication schedule**

|    | Preparation | Drug | Indication | Dosage | Intake interval | Route of administration | Prescription status | Therapy goal (DMD, symptom treatment, treatment of comorbidities or other conditions) |
|----|-------------|------|------------|--------|-----------------|-------------------------|---------------------|---------------------------------------------------------------------------------------|
|    |             |      |            |        |                 |                         |                     |                                                                                       |
| 1  |             |      |            |        |                 |                         |                     |                                                                                       |
| 2  |             |      |            |        |                 |                         |                     |                                                                                       |
| 3  |             |      |            |        |                 |                         |                     |                                                                                       |
| 4  |             |      |            |        |                 |                         |                     |                                                                                       |
| 5  |             |      |            |        |                 |                         |                     |                                                                                       |
| 6  |             |      |            |        |                 |                         |                     |                                                                                       |
| 7  |             |      |            |        |                 |                         |                     |                                                                                       |
| 8  |             |      |            |        |                 |                         |                     |                                                                                       |
| 9  |             |      |            |        |                 |                         |                     |                                                                                       |
| 10 |             |      |            |        |                 |                         |                     |                                                                                       |
| 11 |             |      |            |        |                 |                         |                     |                                                                                       |
| 12 |             |      |            |        |                 |                         |                     |                                                                                       |
| 13 |             |      |            |        |                 |                         |                     |                                                                                       |
| 14 |             |      |            |        |                 |                         |                     |                                                                                       |
| 15 |             |      |            |        |                 |                         |                     |                                                                                       |
| 16 |             |      |            |        |                 |                         |                     |                                                                                       |
| 17 |             |      |            |        |                 |                         |                     |                                                                                       |
| 18 |             |      |            |        |                 |                         |                     |                                                                                       |
| 19 |             |      |            |        |                 |                         |                     |                                                                                       |
| 20 |             |      |            |        |                 |                         |                     |                                                                                       |
