# Supplementary material for: Depression and Anxiety in Association with Polypharmacy in Patients with Multiple Sclerosis
Source: MDPI journal article supplement (doi:10.3390/jcm12165379), 2023-08-18
Supplement: s1 [file s1]

**Supplementary Table S2. Frequency of use of drug classes according to ATC classification system in relation to depression (*n* (%))**

|                                                                          | HADS-D<br>0-7 | HADS-D<br>8-10 | HADS-D<br>11-21 | Total<br>sample | <i>p</i>          |
|--------------------------------------------------------------------------|---------------|----------------|-----------------|-----------------|-------------------|
| A02 - Drugs for acid related disorders                                   | 54 (20.5)     | 23 (32.4)      | 12 (31.6)       | 89 (23.9)       | 0.056             |
| A03 - Drugs for functional gastrointestinal disorders                    | 0 (0.0)       | 2 (2.8)        | 0 (0.0)         | 2 (0.5)         | <b>0.014</b>      |
| A04 - Antiemetics and antinauseants                                      | 1 (0.4)       | 0 (0.0)        | 0 (0.0)         | 1 (0.3)         | 0.813             |
| A06 - Drugs for constipation                                             | 6 (2.3)       | 2 (2.8)        | 0 (0.0)         | 8 (2.1)         | 0.605             |
| A07 - Antidiarrheals, intestinal anti-inflammatory/anti-infective agents | 4 (1.5)       | 0 (0.0)        | 1 (2.6)         | 5 (1.3)         | 0.471             |
| A10 - Drugs used in diabetes                                             | 5 (1.9)       | 8 (11.3)       | 1 (2.6)         | 14 (3.8)        | <b>0.001*</b>     |
| A11 – Vitamins                                                           | 129 (48.9)    | 37 (52.1)      | 20 (52.6)       | 186 (49.9)      | 0.833             |
| A12 - Mineral supplements                                                | 34 (12.9)     | 13 (18.3)      | 3 (7.9)         | 50 (13.4)       | 0.282             |
| A16 - Other alimentary tract and metabolism products                     | 0 (0.0)       | 1 (1.4)        | 0 (0.0)         | 1 (0.3)         | 0.119             |
| B01 - Antithrombotic agents                                              | 37 (14.0)     | 14 (19.7)      | 2 (5.3)         | 53 (14.2)       | 0.118             |
| C01- Cardiac therapy                                                     | 2 (0.8)       | 3 (4.2)        | 1 (2.6)         | 6 (1.6)         | 0.104             |
| C02 - Antihypertensive drugs                                             | 2 (0.8)       | 1 (1.4)        | 0 (0.0)         | 3 (0.8)         | 0.726             |
| C03 - Diuretic drugs                                                     | 8 (3.0)       | 8 (11.3)       | 1 (2.6)         | 17 (4.6)        | <b>0.011</b>      |
| C07 - Beta blocking agents                                               | 32 (12.1)     | 12 (16.9)      | 4 (10.5)        | 48 (12.9)       | 0.510             |
| C08 - Calcium channel blockers                                           | 12 (4.5)      | 2 (2.8)        | 2 (5.3)         | 16 (4.3)        | 0.777             |
| C09 - Agents acting on the renin-angiotensin system                      | 47 (17.8)     | 14 (19.7)      | 5 (13.2)        | 66 (17.7)       | 0.691             |
| C10 - Lipid modifying agents                                             | 24 (9.1)      | 14 (19.7)      | 1 (2.6)         | 39 (10.5)       | <b>0.009</b>      |
| G04 - Urological drugs                                                   | 40 (15.2)     | 13 (18.3)      | 7 (18.4)        | 60 (16.1)       | 0.747             |
| H02 - Corticosteroids systemic                                           | 45 (17.0)     | 19 (26.8)      | 7 (18.4)        | 71 (19.0)       | 0.179             |
| H03 - Thyroid therapy                                                    | 37 (14.0)     | 13 (18.3)      | 3 (7.9)         | 53 (14.2)       | 0.328             |
| L02 - Endocrine therapy                                                  | 1 (0.4)       | 1 (1.4)        | 1 (2.6)         | 3 (0.8)         | 0.284             |
| L03 - Immunostimulants drugs                                             | 67 (25.4)     | 10 (14.1)      | 10 (26.3)       | 87 (23.3)       | 0.122             |
| L04 - Immunosuppressants drugs                                           | 101 (38.3)    | 23 (32.4)      | 15 (39.5)       | 139 (37.3)      | 0.634             |
| M01 - Anti-inflammatory and antirheumatic drugs                          | 44 (16.7)     | 12 (16.9)      | 11 (28.9)       | 67 (18.0)       | 0.177             |
| M02 - Topical products for joint and muscular pain                       | 1 (0.4)       | 0 (0.0)        | 0 (0.0)         | 1 (0.3)         | 0.813             |
| M04 - Antigout preparations                                              | 1 (0.4)       | 2 (2.8)        | 0 (0.0)         | 3 (0.8)         | 0.105             |
| M05 - Drugs effecting bone structure and mineralization                  | 5 (1.9)       | 2 (2.8)        | 0 (0.0)         | 7 (1.9)         | 0.586             |
| M09 - Other drugs for disorders of the musculo-skeletal system           | 2 (0.8)       | 0 (0.0)        | 0 (0.0)         | 2 (0.5)         | 0.660             |
| N02 - Analgesic drugs                                                    | 65 (24.6)     | 26 (36.6)      | 11 (28.9)       | 102 (27.3)      | 0.128             |
| N03 - Antiepileptic drugs                                                | 28 (10.6)     | 12 (16.9)      | 10 (26.3)       | 50 (13.4)       | <b>0.018</b>      |
| N04 - Antiparkinson drugs                                                | 4 (1.5)       | 4 (5.6)        | 3 (7.9)         | 11 (2.9)        | <b>0.031</b>      |
| N05 - Psycholeptic drugs                                                 | 5 (1.9)       | 3 (4.2)        | 5 (13.2)        | 13 (3.5)        | <b>0.002</b>      |
| N06 – Psychoanaleptics                                                   | 40 (15.2)     | 17 (23.9)      | 15 (39.5)       | 72 (19.3)       | <b>&lt;0.001*</b> |
| N07 - Other nervous system drugs                                         | 17 (6.4)      | 9 (12.7)       | 6 (15.8)        | 32 (8.6)        | 0.061             |
| R03 - Drugs for obstructive airway diseases                              | 11 (4.2)      | 2 (2.8)        | 1 (2.6)         | 14 (3.8)        | 0.807             |
| R05 - Cough and cold drugs                                               | 1 (0.4)       | 0 (0.0)        | 0 (0.0)         | 1 (0.3)         | 0.813             |
| R06 - Antihistamines for systemic use                                    | 17 (6.4)      | 6 (8.5)        | 5 (13.2)        | 28 (7.5)        | 0.321             |
| V03 - All other therapeutic products                                     | 0 (0.0)       | 2 (2.8)        | 0 (0.0)         | 2 (0.5)         | <b>0.014</b>      |
| V06 - General nutrients                                                  | 14 (5.3)      | 7 (9.9)        | 4 (10.5)        | 25 (6.7)        | 0.241             |
| V60A – Homeopathics                                                      | 4 (1.5)       | 2 (2.8)        | 0 (0.0)         | 6 (1.6)         | 0.524             |

Chi-square test was used to calculate *p*-values, \* – *p* after FDR correction <0.05, df – degree of freedom, FDR – False Discovery Rate, HADS-D – subscale of depression of the Hospital Anxiety and Depression Scale, *n* – number of patients, *p* – *p*-value for comparing patients with different HADS-D score
