# Supplementary material for: Depression and Anxiety in Association with Polypharmacy in Patients with Multiple Sclerosis
Source: MDPI journal article supplement (doi:10.3390/jcm12165379), 2023-08-18
Supplement: s1 [file s1]

**Supplementary Table S3. The most common comorbidities occurring besides MS stratified by anxiety and depression severity level (*n* (%))**

|                                 | HADS-A    |           |           |                     | HADS-D    |           |           |                     |
|---------------------------------|-----------|-----------|-----------|---------------------|-----------|-----------|-----------|---------------------|
|                                 | 0-7       | 8-10      | 11-21     | <i>p</i>            | 0-7       | 8-10      | 11-21     | <i>p</i>            |
| Hypertension                    | 55 (26.6) | 24 (23.3) | 14 (21.9) | 0.683               | 64 (24.2) | 21 (29.6) | 8 (21.1)  | 0.551               |
| Depression                      | 18 (8.7)  | 23 (22.3) | 19 (29.7) | <b>&lt;0.001***</b> | 30 (11.4) | 14 (19.7) | 16 (42.1) | <b>&lt;0.001***</b> |
| Thyroid disease                 | 34 (16.4) | 17 (16.5) | 6 (9.4)   | 0.358               | 39 (14.8) | 16 (22.5) | 2 (5.3)   | 0.053               |
| Symptoms of nutrient deficiency | 28 (13.5) | 12 (11.7) | 4 (6.3)   | 0.287               | 32 (12.1) | 11 (15.5) | 1 (2.6)   | 0.134               |
| Gastrointestinal symptoms       | 17 (8.2)  | 11 (10.7) | 8 (12.5)  | 0.545               | 23 (8.7)  | 6 (8.5)   | 7 (18.4)  | 0.154               |
| Dyslipidemia                    | 17 (8.2)  | 7 (6.8)   | 3 (4.7)   | 0.623               | 17 (6.4)  | 9 (12.7)  | 1 (2.6)   | 0.101               |
| Bladder symptoms                | 12 (5.8)  | 9 (8.7)   | 3 (4.7)   | 0.503               | 15 (5.7)  | 5 (7.0)   | 4 (10.5)  | 0.509               |
| Osteoporosis                    | 12 (5.8)  | 8 (7.8)   | 1 (1.6)   | 0.235               | 16 (6.1)  | 4 (5.6)   | 1 (2.6)   | 0.692               |
| Migraine                        | 3 (1.4)   | 6 (5.8)   | 8 (12.5)  | <b>0.001**</b>      | 11 (4.2)  | 5 (7.0)   | 1 (2.6)   | 0.491               |
| Allergy                         | 12 (5.8)  | 4 (3.9)   | 1 (1.6)   | 0.339               | 17 (6.4)  | 0 (0.0)   | 0 (0.0)   | <b>0.025</b>        |
| Diabetes mellitus               | 8 (3.9)   | 4 (3.9)   | 4 (6.3)   | 0.693               | 7 (2.7)   | 8 (11.3)  | 1 (2.6)   | <b>0.006*</b>       |
| Asthma bronchiale               | 9 (4.3)   | 5 (4.9)   | 3 (4.7)   | 0.978               | 13 (4.9)  | 2 (2.8)   | 2 (5.3)   | 0.734               |

Chi-square test was used to calculate p-values, \* - *p* after FDR correction <0.05, \*\**p* after FDR correction <0.01, \*\*\* *p* after FDR correction <0.001, df – degree of freedom, FDR – False Discovery Rate, HADS-A – subscale of anxiety of the Hospital Anxiety and Depression Scale, HADS-D – subscale of depression of the Hospital Anxiety and Depression Scale, *n* – number of patients, *p* – p-value for comparing patients with different HADS-A or HADS-D score
